# Supplementary material for: Harnessing Genomic and Bioinformatics for Surveillance of Pathogens in Africa: A Scoping Review of Existing Training and Gaps in Training
Source: Research Square preprint supplement (doi:10.21203/rs.3.rs-7651167/v1), 2025-12-11
Supplement: Supplementary file 1 [file 07b5581df5cac5041aed60e8.xlsx]

## Sheet: Clean Complete Scoping review d
Covidence #	Study ID	Title	Year of publication	Journal/publisher	Study design	Was the article included because it reported on a specific training or because it highlights training status/need in Africa?	Date of training/review	Country in which the study was conducted	If focused on specific Africa countries, list countries	Focus of training or text	Where did the training/Study take place?	Length of training or review	Nature of training	Nature of training	Training or relevant resources available online?	Links to training information or resources	Area of deficiency in training	Training opportunities identified	Outcome of training/plan for the future/Recommendation from review	Other details of training/context	Training Organisers	Training Funders	Was the article included because it reported on a specific training or because it highlights training status/need in Africa?
1652	Gilchrist 2015	Whole-Genome Sequencing in Outbreak Analysis.	2024	Journal ASM	Opinion/Perspective	Highlights training needs/status	2024	Focus on Africa only	Africa	Genomics	Africa	N/A	N/A	N/A	No	No	"Many laboratories are currently using laboratory assays that were developed for research and have never been validated for forensic applications." "Challenges that need to be addressed for WGS to be of use during an outbreak are the legal issues... and the practicality of comprehensive sample collection and storage."	N/A	"New or updated protocols would be useful to allow the coordination of law enforcement, public health, and national security officials."	"Ironically, WGS may cause additional forensic headaches because it lends additional clarity. When such clarity was not possible, the legal system tolerated decisions made on conjectures and gaps in evidence. It is likely that this will no longer be the case. On a related note, many laboratories are currently using laboratory assays that were developed for research and have never been validated f…	N/A	N/A	Highlights training needs/status
1484	DuarteASR 2020	Addressing Learning Needs on the Use of Metagenomics in Antimicrobial Resistance Surveillance.	2020	Frontiers in Public Health	Case Study	Training	2020	Africa and other parts of the world	Africa	Genomics	Not clear	not clear	In-person	One-off	Yes	https://www.coursera.org/learn/metagenomics	A future perspective for improvement of the MOOC is to provide less technically demanding and infrastructure-dependent practical exercises. Furthermore, we intend to periodically review the course content and update it following the latest research developments	Throughout the training, the main challenge has been to adjust to the variable level of background and skills of the participants. In general, the hands-on training was well-received, both during the workshop, and by the MOOC learners. However, when technical difficulties arise in operating the software programs for data analysis, it is difficult to provide adequate support to those in need. Furt…	The participants were asked to assess the main challenges and gaps for the implementation of metagenomics in surveillance (Figure 2), and the results showed that harmonization of protocols and interpretation of results (including uncertainty and association of metagenomics data with risk factors) are considered main hurdles. The lack of standards and legislation, and the implementation costs were…		European project Ecology from Farm to Fork Of Microbial drug Resistance and Transmission (EFFORT) H3	European Commision	Training
1112	Chukwudi 2021	Consolidating and Upscaling Molecular Research Capacity in Nigeria: On Who's Account?	2022	Frontiers in Research Metrics and Analytics	Opinion/Perspective	Highlights training needs/status	2022	Focus on Africa only	Nigeria	Genomics; Bioinformatics	Nigeria	N/A	N/A	N/A	N/A	N/A	However, as molecular research capacity building efforts continue to improve, many Nigerian research personnel have received specialized molecular research training (mostly at foreign institutions), and many have returned home after their training to help to build molecular research capacity in their home institutions. Unfortunately, the challenges of non-functional laboratories and poor or uncon…	- Many Nigerian research personnel have received specialized molecular research training (mostly at foreign institutions), and many have returned home after their training to help to build molecular research capacity in their home institutions."Â . - "The National Institutes of Health (NIH), in partnership with Wellcome Trust, initiated a 10-year research funding (2011â€“2021) for the Human Hered…	- "Although the working conditions are far from being ideal, molecular research scientists in Nigeria must find an inner motivation to remain committed and resolute, knowing that their work will greatly impact their local communities"Â . - "The research institutions need to step up efforts to provide the necessary support to the researchers by providing a conducive working environment for them. S…	N/A	N/A	N/A	Highlights training needs/status
1052	Davedow 2022	PulseNet International Survey on the Implementation of Whole Genome Sequencing in Low and Middle-Income Countries for Foodborne Disease Surveillance.	2022	FOODBORNE PATHOGENS AND DISEASE	Cross sectional study	Highlights training needs/status	2022	Africa and other parts of the world	Africa	Genomics; Bioinformatics	N/A	N/A	N/A	N/A	N/A	N/A	The primary challenges and barriers to WGS implementation are related to access to qualified personnel and data analysis and interpretation." "Lack of funding and training were identified as both the top barriers for WGS implementation (78% and 56%), and the biggest needs for achieving WGS within their institution (46% and 46%)." Capacity for computation and bioinformatics was found to be general…	"With WGS comes universal, unambiguous, and comparable data generated by all and the opportunity to enable global foodborne disease surveillance." "Opportunities to seek sustainable funding, provide training, and identify solutions for a globally standardized surveillance platform will accelerate implementation of WGS worldwide."	Nearly half of laboratories (51%) believe that the priorities of PNI should focus on training, especially in WGS data analysis, and that having access to globally standardized and validated analysis tools and pipelines (31%) are key to progress toward global foodborne disease surveillance using WGS."	"PulseNet International (PNI) is a global network of 88 countries who work together through their regional and national public health laboratories to track foodborne disease around the world. The vision of PNI is to implement globally standardized surveillance using whole genome sequencing (WGS) for real-time identification and subtyping of foodborne pathogens to strengthen preparedness and respo…	N/A	N/A	Highlights training needs/status
1026	Binder 2021	African National Public Health Institutes Responses to COVID-19: Innovations, Systems Changes, and Challenges.	2021	Health Security	Cross sectional study	Training	2021	Focus on Africa only	Africa	Genomics; Bioinformatics	Online	2 days	Online	One-off	No	N/A	"Shortages of trained workers impacted responses in all countries." "Participants noted a lack of individuals trained in several disciplines that are increasingly used for forecasting and decisionmaking. These include economic analysis, mathematical modeling, and analysis of big data." "In addition to having the capacity to analyze genomes, NPHIs need people with bioinformatics skills to interpre…	"Many addressed this issue by working with the private sector to develop in-country capacity to manufacture needed supplies." "The COVID-19 pandemic has brought a massive expansion of laboratory testing, through the establishment of new public health laboratories and linkages with private (including research) laboratories." "Use of virtual platforms for meetings and training is likely to continue…	NPHIs and their partners should continue to advocate for sustainable funding from their governments and stakeholders and ensure that the work being done can continue to be leveraged to address ongoing public health issues and mitigate future pandemics." "To the extent possible, the impact of these changes should be documented and critical capacities that have developed during the crisis should be…	"National public health institutes (NPHIs)â€”science-based governmental agencies typically part of, or closely aligned with, ministries of healthâ€”have played a critical part in many countriesâ€™ responses to the COVID-19 pandemic."	The International Association of National Public Health Institutes (IANPHI), Africa Regional Network	US CDC	Training
839	Bentahir 2022	Providing On-Site Laboratory and Biosafety Just-In-Time Training Inside a Box-Based Laboratory during the West Africa Ebola Outbreak: Supporting Better Preparedness for Future Health Emergencies.	2022	International Journal of Environmental Research and Public Health	Case Study	Training	2014-2015	Focus on Africa only	Guinea, Sierra leone, and Liberia	Genomics	Guinea Conakry	4 months	In-person	One-off	No	No			The training had a significant impact on the career development of the two Guinean biologists. One trainee (KK) secured a position with MSF Belgium/France, while the other (MDB) was appointed director of Guineaâ€™s haemorrhagic fever laboratory in Nâ€™Zerekore. The study suggests that instead of issuing certificates of attendance, future training programs should provide certificates of technical …		The Biological Light Fieldable Laboratory for Emergencies (B-LiFE)	European Space Agency Integrated Applications Promotion (IAP) Advanced Research in Telecommunications Systems (ARTES) programme.	Training
670	Chimusa 2015	"Broadband" Bioinformatics Skills Transfer with the Knowledge Transfer Programme (KTP): Educational Model for Upliftment and Sustainable Development.	2015	PLOS Computational Biology	Case Study	Highlights training needs/status	2015	Focus on Africa only	Africa	Bioinformatics	N/A	N/A	N/A	N/A	N/A	N/A	Short-term training programmes are useful but have proved to be unsustainable and costly, since knowledge and skills are not retained over time. The study of bioinformatics is complex and consists of multiple disci- plines essential to biomedical and life science research [8]. Due to the diverse backgrounds of students, it is challenging to improve capacity within bioinformatics and computational…	The amount of biological data generated by sequencing projects of various species, genome variation studies, and other large data â€œomicsâ€_x009d_ studies pres- ent challenges; demand outstrips supply, and capacity to interpret this complex data is limited in Africa.	We propose a formalized matchmaking system, which is aimed at reversing this trend, by introducing the Knowledge Transfer Programme (KTP). Instead of individual researchers travelling to other labs to learn, researchers with desirable skills are invited to join African research groups for six weeks to six months. Visiting researchers or trainers will pass on their expertise to multiple people sim…	A substantial number of African scientists, including bioinformaticians, go abroad because of competitive salaries, better job opportunities, and well-resourced institutions. This creates a strain on local, skilled bioinformaticians while the need for bioinformatics capabilities contin- ues to increase [20, 21, 23]. As a result, the brain drain of bioinformatics skills in Africa is alarming; numb…	N/A	N/A	Highlights training needs/status
559	Nembaware 2019	The African Genomic Medicine Training Initiative (AGMT): Showcasing a Community and Framework Driven Genomic Medicine Training for Nurses in Africa.	2019	Frontiers in Genetics	Case Study	Training	2016	Focus on Africa only	Africa	Genomics	Senegal	N/A	Online	Still ongoing	No	No		Competencies in genomics and genetics for nurses have been developed and are publicly available online. However, the alignment of existing curricula to such competencies remains limited or is probably reported poorly. The slow rate of curricula modifications in Europe and America has been largely attributed to lack of implementing personnel and difficulties in operationalization of long and compl…	The draft curriculum and competency map provided from this work are likely to promote increased adoption and adaptation of the genomic medicine training into existing nursing curricula across nurse training colleges and centers across Africa. The embedding of online/distance learning modules into formal university/college training has been demonstrated for various massive online open courses (MOO…			National Institutes of Health	Training
528	deVries 2017	Regulation of genomic and biobanking research in Africa: a content analysis of ethics guidelines, policies and procedures from 22 African countries.	2017	BMC Medical Ethics	Cross sectional study	Highlights training needs/status	2017	Focus on Africa only	Africa	Genomics	N/A	N/A	N/A	N/A	No	No	The absence of regulation for genomic research in Africa is not peculiar to genomic research but biomedical research as a whole, [29] note that most countries are still developing standard operating procedures for their research ethics committees and some countries do not have existing guidelines for health research despite ongoing research in these countries.		Key principles that ought to be incorporated into African guidance for genomic research and biobanking relate to promoting African leadership and ownership of genomics and biobanking science and capacity strengthening as an essential feature of international collaboration. We believe that specific guidance is needed to support ethics committee decision-making, particularly regarding sample and da…	Where specific ethics guidelines are absent, re- searchers and ethics committees are left to make their own decisions, without a framework for their delibera- tions and decisions. The risk is that fears and misunder- standing could then guide decision-makingâ€”which would hardly be conducive to thorough ethical reflec- tion. We found that in those countries where guidelines are very specific, the…	N/A	N/A	Highlights training needs/status
510	Musanabaganwa 2020	Building Skills and Resources for Genomics, Epigenetics, and Bioinformatics Research for Africa: Report of the Joint 11th Conference of the African Society of Human Genetics and 12th H3Africa Consortium, 2018.	2020	America Journal of Tropical Medicine	Case Study	Training	2020	Focus on Africa only	Africa	Genomics; Bioinformatics	Rwanda	Two days	In-person	Regular (Yearly, Monthly)	No	No	the document identifies areas of deficiency in training. Specifically, it mentions the need for increased human resources and training opportunities, particularly in genetics research. It states: "Guida Landoure from Mali referred to Africa as a region of opportunity for genetic studies, highlighting that Africa today is not at the forefront of this field of research. He attributes this to a lack…	1. Face-to-Face Workshops and Courses: Although they supported a limited number of attendees, these had the highest proportion of positive feedback. - "Although face-to-face workshops and courses had the highest proportion of attendees who returned positive feedback..." 1. Distance-Based Learning Methods: These were successful in reaching a larger audience across the continent and included course…		it was part of an ongoing series of collaborations between the African Society of Human Genetics (AfSHG) and the Human Heredity and Health in Africa (H3Africa) Consortium. This was the fourth collaboration between them in hosting a joint conference on genomic research in Africa, following previous meetings in Accra (Ghana) in 2013, Dakar (Senegal) in 2016, and Cairo (Egypt) in 2017. This is on pr…	African Society of Human Genetics (AfSHG) in partnership with various organizations. Specifically, it was part of the 11th AfSHG Congress and the 12th Human Heredity and Health in Africa (H3Africa) Consortium meeting	The Government of Rwanda, The National Institutes of Health, The Wellcome Trust, Institute Pasteur, Promega Corporation, Africa Biosystems Limited, The Galton Institute	Training
506	Nyaga 2020	Report of the 1st African Enteric Viruses Genome Initiative (AEVGI) Data and Bioinformatics Workshop on whole-genome analysis of some African rotavirus strains held in Bloemfontein, South Africa.	2020	Vaccine	Case Study	Training	2018	Focus on Africa only	Africa	Genomics; Bioinformatics	South Africa	4 days	In-person	One-off	N/A	N/A	"Consistent with the viewpoint of the organizers of the workshop, the need for such training has been demonstrated at local, national, regional and international fora."	"The workshop fostered interactions and networking between professionals, scientific experts, technicians and students." "Such initiative will help in realizing the goal of capacity building and knowledge transfer to the next generation of scientists in Africa within the niche of RV genomic characterization projects."	"Overall, judging by the results of analyses of feedback received at the end of the events, the participants craved for more similar sessions on Data and Bioinformatics by AEVGI to allow for proficiency and better understanding of NGS concepts and huge data set analyses."	The University of the Free State - Next Generation Sequencing (NGS) Unit, Bloemfontein, South Africa, hosted a data and bioinformatics workshop from 19 to 22 June 2018. The workshop was coordinated by the African Enteric Viruses Genome Initiative (AEVGI) with support from the Bill & Melinda Gates Foundation."	African Enteric Viruses Genome Initiative (AEVGI)	Bill and Melinda Gates Foundation	Training
505	MaljkovicBerry 2020	A Department of Defense Laboratory Consortium Approach to Next Generation Sequencing and Bioinformatics Training for Infectious Disease Surveillance in Kenya.	2020	Frontiers in Genetics	Case Study	Training	2019	Focus on Africa only	Kenya	Genomics; Bioinformatics	Kenya	One week	In-person	One-off	No	No	There were substantial gains in self-reported knowledge across all skill domains (Table 1), with the notable exception of Linux OS and command line skills, suggesting that this is a particular area of residual training need. Indeed, Linux OS and command line skill had the lowest post-workshop self-reported knowledge scores. A module was later developed specifically to fill this gap." Additionally…	The training opportunities identified included: Development of additional training modules â€“ Based on identified gaps, a module on Linux OS and command line skills was later developed to address deficiencies in bioinformatics skills. From the article: "A module was later developed specifically to fill this gap." Follow-up training and mentorship â€“ A long-term training and mentorship mechanism…	There were substantial gains in self-reported knowledge across all skill domains (Table 1), with the notable exception of Linux OS and command line skills. The participants also reported that the information on study design, sample preparation, sequencing quality control, data quality assessment, reporting, and basic and advanced bioinformatics analysis were the most useful information presented …	N/A	United States Government and the Department of Defense (DoD)	United States Government and the Department of Defense (DoD)	Training
500	HernÃ¡ndez-de-Diego 2017	The eBioKit, a stand-alone educational platform for bioinformatics.	2017	Computational biology	Review article	Training	2017	Focus on Africa only	Africa	Bioinformatics	Niger, Nigeria, Camerron, Uganda, Kenya, Tanzania, Mauritius, South Africa	2007 till date	In-person	Still ongoing	Yes	http://www.ebiokit.eu			he eBioKit has been conceived to be a robust, user-friendly, and easy-to-manage teaching tool for courses and workshops and has demonstrated itself to be a valuable resource for insti- tutions, universities, research centers, or schools that would like to start teaching bioinformat- ics or even provide bioinformatics capabilities for their groups. The platform is based on open source and open acc…	The eBioKit was first developed in 2007 as a response to the lack of reliable and sufficient internet connections and the short time available to visiting researchers for conducting hands-on training at workshop or short courses. In many cases, utilization of large public data- bases of biomolecular data by the course software is required and valuable time is lost config- uring locally provided c…	N/A	N/A	Training
481	Carey 2023	Unlocking the Potential of Genomic Data to Inform Typhoid Fever Control Policy: Supportive Resources for Genomic Data Generation, Analysis, and Visualization.	2023	Open Forum Infectious Diseases	Review article	Highlights training needs/status	2023	Africa and other parts of the world	Africa	Genomics; Bioinformatics	N/A	The review discusses the global importance of genomic surveillance for Salmonella Typhi and highlights various platforms and initiatives that facilitate data sharing and analysis. It specifically focuses on the African continent while also considering broader global efforts. The study introduces key resources such as Africa CDCâ€™s Pathogen Genomics Initiative, SEQAFRICA, Typhi Pathogenwatch, Typ…	N/A	N/A	N/A	N/A	The deficiency highlighted in the study is the limited uptake and sustainability of Salmonella Typhi genomic data generation and surveillance. While platforms and programs exist to facilitate data analysis and visualization, there is a need for greater adoption of these resources. Additionally, the study points out the lack of sustained support for molecular surveillance capacity, emphasizing the…		In addition, we hope that gov- ernments, donors, and other stakeholders continue to support the establishment and sustenance of molecular surveillance ca- pacity by providing funding for procurement of equipment and reagents, training for bioinformaticians, establishment of quality-assured laboratories, and sample management			N/A	Highlights training needs/status
469	Shaffer 2019	Expanding Research Capacity in Sub-Saharan Africa Through Informatics, Bioinformatics, and Data Science Training Programs in Mali.	2019	Frontiers in Genetics	Case Study	Training	2017	Focus on Africa only	Mali	Genomics; Bioinformatics	Mali	progressive milestones in bioinformatics training from 1989 to 2017	In-person	Regular (Yearly, Monthly)	No	No		Long-term sustainability of training and capacity development in Africa will likely require additional support within the host countries in the area of research and development. Among 13 African countries (Cameroon, Gabon, Ghana, Kenya, Malawi, Mali, Mozambique, Nigeria, Sengal, South Africa, Tanzania, Uganda, and Zambia), only 3 countries (Uganda, Malawi, and South Africa) achieved a modest goal…	The primary outcomes of the ITMI and ITGH training programs included numbers of college degrees earned and publication frequencies and rates. These programs laid the foundation for subsequent research and training efforts. Among the trainees in the ITMI and ITGH programs were investigators the West Africa ICEMR and West African Center of Excellence for Global Health Bioinformatics Research Traini…	Challenges reliance of high-speed bandwidth availability on short-term funding, lack of a discounted software portal for basic software applications, protracted application processes for United States visas, lack of industry job positions, and low publication rates in the areas of bioinformatics and data science. Long-term incremental processes are necessary for engaging historically underserved …	Two global health informatics training programs sponsored by the Fogarty International Center (FIC) were carried out at the University of Sciences, Techniques and Technologies of Bamako, Mali (USTTB)	National Institutes of Health	Training
466	Marine 2019	Strengthening laboratory surveillance of viral pathogens: Experiences and lessons learned building next-generation sequencing capacity in Ghana.	2019	Elsevier, International journal of infectious diseases	Case Study	Training	2019	Focus on Africa only	Africa	Genomics	Ghana	21 weeks	In-person	One-off	No	No		Opportunities for collaboration with well-established institutions in capacity building and training of personnel. to ensure the transfer of skills and expertise.	Compared to pre-assessment levels, trainees reported im- proved understanding in all competencies covered in the training (Figure S1), with the greatest improvements reported in NGS library preparation, calculations for sample dilution and pooling, and reference mapping (2.5-, 2.25- and 2.08-point increase in average reported scores, respectively		Department of Virology, Noguchi Memorial Institute for Medical Research, University of Ghana, Legon, Ghana, Division of Viral Diseases, CDC, Atlanta, GA, USA	US CDC	Training
436	Gehre 2023	The East African Community mobile laboratory network prepares for monkeypox outbreaks.	2022	Journal of Public Health in Africa	Case Study	Training	2022	Focus on Africa only	East Africa	Genomics	Burundi, Rwanda, Tanzania, Kenya, Uganda, and South Sudan	Not specified	In-person	One-off	No	No		DNA extraction and diagnosis using real-time polymerase chain reaction (RT-PCR)	The EAC is now prepared the mobile laboratory network to ful- fill this diagnostic role, allowing a much more rapid intervention, a prerequisite for effective monkeypox outbreak containment. Furthermore, increasing the preparedness level of the EAC mobile laboratory network for this proactive and rapid response demon- strates the successful integration and utilization of the mobile lab- oratories…		Bernhard Nocht Institute for Tropical Medicine and the National Public Health Laboratories (NPHLs) of Tanzania, Kenya, Uganda, Rwanda, Burundi and South Sudan	German Federal Ministry for Economic Cooperation and Development (BMZ) through the German Development Bank, KfW	Training
417	Tindana 2017	Developing the science and methods of community engagement for genomic research and biobanking in Africa.	2017	Global health, epidemiology and Genomics	Case Study	Training	2025-07-09	Focus on Africa only	Africa	Genomics; Bioinformatics	South Africa	N/A	In-person	One-off	No	No	the work-shop discussions suggested that for many of the H3Africa projects represented at the meeting, CE was an afterthought that was not planned systematically	N/A	We have suggested some key points that need to be considered and encourage further discourse on this subject as well as empirical studies to examine effective ways in which CE can truly support â€˜openâ€™ science.	Under the auspices of the Human Heredity and Health in Africa Initiative (H3Africa), the H3Africa CE working group organized a workshop in Stellenbosch, South Africa in March 2016.	Human Heredity and Health in Africa Initiative (H3Africa)	National Institutes of Health and the Wellcome Trust	Training
407	Giovanni 2023	African Centers of Excellence in Bioinformatics and Data Intensive Science: Building Capacity for Enhancing Data Intensive Infectious Diseases Research in Africa.	2023	Journal of Infectious Diseases and Microbiology	Case Study	Highlights training needs/status	2023	Focus on Africa only	Africa	Bioinformatics	Africa	N/A	N/A	N/A	N/A	N/A	Enhancing bioinformatics and data science training and mentorship, increasing the number of trained bioinformaticians in Africa, and advancing biomedical research, much remains to be done				The African Centers of Excellence in Bioinformatics and Data Intensive Science	US federal funds from the National Institute of Allergy and Infectious Diseases, National Institutes of Health	Highlights training needs/status
390	Abrudan 2021	Train-the-Trainer as an Effective Approach to Building Global Networks of Experts in Genomic Surveillance of Antimicrobial Resistance (AMR).	2021	clinical infectious diseases, IDSA, Hivma, Oxford	Case Study	Training	2021	Africa and other parts of the world	Nigeria, South Africa, Sudan	Genomics; Bioinformatics	United Kingdom	6 days	In-person	One-off	On demand	Materials for this course are available on demand for anyone interested in developing training materials for other related TtT courses. This course was also used as a case study for demonstrating effective strategies for capacity building through training for genomic surveillance of AMR (https://www.futurelearn.com/courses/train-the-trainer-design-genomics-training).	N/A	N/A	Upon follow-up after 6 months, at least 40% of trainees had initiated training programs and collaborations to build capacity at local, national, and regional level.		NIHR Global Health Research Unit (GHRU) through the Centre of Genomic Pathogen Surveillance (CGPS), Wellcome Genome Campus Advanced Courses and Scientific Conferences (ACSC	National Institute for Health Research and the Wellcome Trust	Training
380	Ras 2021	Using a multiple-delivery-mode training approach to develop local capacity and infrastructure for advanced bioinformatics in Africa.	2021	Plos Computational Biology	Case Study	Training	2019	Focus on Africa only	Africa	Bioinformatics	Morocco, Nigeria, Ghana, Egypt, South Africa, Kenya, Uganda, Sudan, Mauritius, Tanzania, Tunisia	2 months	Online	Regular (Yearly, Monthly)	Yes	"Content remains available indefinitely after course end and are under a creative commons license allowing anyone to reuse it with the proper credit." "All lecture videos made available directly on Vula and via a publicly accessible YouTube playlist."	"One of the main challenges with this approach is the computational requirements for the hosting site. Some classrooms could not participate as they could not meet classroom specifications and the organising team occasionally needed to host additional participants." "For the course to run effectively, a dedicated, experienced SA (System Administrator) was required. These skills were not always im…		"146 participants met the requirements to pass the course and obtained the course letter of completion." "At most hosting sites, classrooms allowed a period of access to containers postcourse to allow participants to analyse their own data, while others gained the confidence to apply for formal access to local compute facilities and performed analyses there." "The pilot H3ABioNet 16S course ran s…	"With more microbiome studies being conducted by African-based research groups, there is an increasing demand for knowledge and skills in the design and analysis of microbiome studies and data. However, high-quality bioinformatics courses are often impeded by differences in computational environments, complicated software stacks, numerous dependencies, and versions of bioinformatics tools along w…	The pan African Bioinformatics Network (H3ABioNet)	National Institutes of Health	Training
373	Ahmed 2020	Delivering blended bioinformatics training in resource-limited settings: a case study on the University of Khartoum H3ABioNet node.	2020	Briefings in Bioinformatics,	Opinion/Perspective	Training	2017	Focus on Africa only	Sudan	Genomics; Bioinformatics	Sudan	2 weeks	Blended	Regular (Yearly, Monthly)	Yes	2017 training resources (Text, ppt, videos) available online at https://training.h3abionet.org/IBT_2017.	N/A	N/A	Design-wise, the IBT_2017 benefited from clearly defined learn- ing outcomes, interactive tutorial sessions between trainers and course participants and sufficient time for hands-on sessions Delivering blended bioinformatics training facilitated by local TAs. Collectively, these elements gave participants clear expectations, and they were able to both evaluate their progress and meet the course r…	earners in less-developed countries are keen on seizing educational opportunities. For MOOCs to be attractive, some effort is needed. â€¢ Blended learning employing multi-delivery models can be effective in bridging the achievement gap in MOOCs, even in bioinformatics courses. â€¢ The recruitment of local TAs from course alumni improves the sense of belonging to a MOOC and, hence, improves learne…	The pan African Bioinformatics Network (H3ABioNet)	N/A	Training
364	Gurwitz 2017	Designing a course model for distance-based online bioinformatics training in Africa: The H3ABioNet experience.	2017	Plos Computational Biology	Review article	Training	2016	Focus on Africa only	Africa	Genomics; Bioinformatics	Africa	Based on these details, the IBT course appears to be a multi-week program, likely lasting around 3 to 4 months (approximately 12 to 16 weeks), assuming biweekly sessions and coverage of multiple modules.	Hybrid	Regular (Yearly, Monthly)	Yes	http://training.h3abionet.org/IBT_2016/	Staff Training Quote: "While staff were supported by the core team throughout the course, providing formal training would prepare the local staff for the running of their classroom by providing a space for the staff to establish a team atmosphere in which everyone knows their responsibilities and how they might assist each other during the course, providing facilitation skills training so that th…	1. Expert Trainers â€¢ Training Opportunity: Leveraging high-quality, Africa-based expert trainers to deliver content and foster a new course design, enhancing the credibility and relevance of the training. â€¢ Quote: "One of the biggest pillars of success of the IBT course was the quality and experience of the expert trainers. Apart from a guest introductory lecture given by expert European bioi…	OUTCOMES OF THE TRAINING 1. Successful Completion Rate â€¢ Quote: "IBT_2016 proved a successful endeavor, with 195 participants (53%) meeting all the course requirements and receiving a letter of completion for the course." (Page 9) 2. Enhanced Accessibility to Bioinformatics Training â€¢ Quote: "A multiple-delivery-mode learning model was constructed for our IBT course in order to address the va…	N/A	The pan African Bioinformatics Network (H3ABioNet)	N/A	Training
295	RiviÃ¨re 2021	Capacity building for whole genome sequencing of Mycobacterium tuberculosis and bioinformatics in high TB burden countries.	2021	Briefings in Bioinformatics	Case Study	Training	2018-2019	Africa and other parts of the world	Ethiopia	Genomics; Bioinformatics	Ethiopia	3 weeks	Blended	Regular (Yearly, Monthly)	No	No	"We faced many challenges during the first two trainings. We experienced that trainees were often underprepared for basic bioinformatics instruction and we struggled to maintain long-term commitment from the trainees after the trainings."	"Many challenges could be overcome by tweaking the program, including a 1-week in-country training, and switching to a commercial DNA extraction kit." "Nevertheless, additional resources will be needed to complement training programs by providing secure access to remote computing services, developing light-weight pipelines that can run in resource-poor settings, investment in WGS research in high…	Within 1 year of training, nine trainees submitted a fundable proposal. One student successfully obtained additional external funding." "To achieve equity and maximum impact of the genomics revolution for TB, it is essential that scientists from high TB burden countries lead WGS research of Mtb activities." "By developing and sharing the components of a 3-week course on WGS and bioinformatics for…	Instead of organizing a â€˜fly in, teach and leaveâ€™ workshop, which often fails to have durable impact, we aimed to build a critical mass of junior researchers and scientists who, upon completion of the training course, would integrate their newly acquired skills into their TB research and/or surveillance work." "In June 2018 and July 2019, 15 individuals from southwest, central and northwest E…	The Tuberculosis Omics ResearCH (TORCH) consortium (Jimma University in Ethiopia, Stellenbosch University in South Africa and the University of Antwerp and the Institute of Tropical Medicine in Belgium).	VLIR-UOS	Training
278	Karikari 2015	Developing expertise in bioinformatics for biomedical research in Africa.	2015	Applied & Translational Genomics	Opinion/Perspective	Highlights training needs/status	2015	Focus on Africa only	Africa	Bioinformatics	N/A	N/A	N/A	N/A	N/A	N/A	Identified Areas of Deficiency in Training 1. Lack of Adequate Training Opportunities (General Availability) o Verbatim Quote from PAGE1 (Abstract): "However, its introduction to Africa has been met with some challenges (such as inadequate infrastructure, training opportunities, research funding, human resources, biorepositaries and databases) that have contributed to the slow pace of development…	Short Courses and Workshops (Practical, Short-Term Training) Verbatim Quote from PAGE2 (Table 1, Training Programmes - Short courses and workshops): "The following organisations regularly organise bioinformatics and the African scientists: ASBCR, ISCR, H3ABioNet, TheND in Africa" Details: This quote indicates that organizations such as the African Society for Bioinformatics and Computational Biol…	Increase Awareness of the Value of Bioinformatics Research and Investment Verbatim Quote from PAGE4: "African governments and policy makers need to be educated about the value of their research, and the need to invest further in it." Details: This recommendation emphasizes the need to educate African governments and policymakers about the importance of bioinformatics research to encourage greater…	N/A	N/A	N/A	Highlights training needs/status
267	Akintola 2024	Bioinformatics proficiency among African students.	2024	Frontier in bioinformatics	Opinion/Perspective	Training	2021-2024	Focus on Africa only	Africa	Bioinformatics	Africa	2021 to 2024	Hybrid	N/A	No	No. Organised Sporadically	1. Access to up-to-date bioinformatics resources, scientific journals, textbooks, software, and databases are perennial issues 2. Many bioinformatics software and tools are proprietary and expensive. The lack of financial means to purchase licenses for these tools limits their practice and learning 3. Insufficient computational infrastructure and resources pose a challenge to bioinformatics resea…	1. International Collaborations for Training: - "Collaborative efforts between African universities and international institutions would ensure progress in training students and researchers in bioinformatics"Â . - "For example, between January to February 2023, NOBLEKINMAT LTD conducted a bioinformatics training tour in collaboration with the European Bioinformatics Institute, UK, and the Institu…	Outcomes of Training: 1. Increased Participation and Reach: - The training programs organized by NOBLEKINMAT LTD showed high registration numbers, illustrating interest and demand: "Bioinformatics 1.0 webinar on DNA and Molecular Data analysis had 300 registered participants"Â . 1. Positive Feedback and Satisfaction: - A survey conducted during the training indicated that participants were satisf…	NOBLEKINMAT LTD's training initiatives are set within the context of addressing the gaps in bioinformatics education and literacy among African students and researchers. The company focuses on providing high-quality bioinformatics training and consultancy services across the continent	NOBLEKINMAT LTD	N/A	Training
260	TastanBishopÃ– 2015	Bioinformatics education--perspectives and challenges out of Africa.	2014	Briefings in bioinformatics	Opinion/Perspective	Highlights training needs/status	2014	Focus on Africa only	Africa	Bioinformatics	N/A	N/A	N/A	N/A	N/A		The available programs are not enough to han- dle the demand, and South African Bioinformatics groups are overwhelmed with applicants from many other African countries [18]. The main reason is most likely the lack of academic faculty able to supervise purely bioinformatics research projects in some of the African institutions. It is important to distinguish between formal quali- fications in bioi…		: Short training courses are important to familiarize students with various as- pects of bioinformatics. However, once students leave the course, they are usually on their own. It is important to follow-up to ensure that students can consolidate and put into practice what they have learned. A system of continuing mentorship and sup- port would ensure that students are able to have regular contact…	N/A	N/A	N/A	Highlights training needs/status
256	Karikari 2015	Bioinformatics in Africa: The Rise of Ghana?	2015	Plos Comput	Opinion/Perspective	Highlights training needs/status	2015	Focus on Africa only	Ghana	Bioinformatics	Ghana	N/A	N/A	N/A	N/A		Whilst a few institutions have some scientists with appreciable knowledge in bioinformatics (S1 Table), most Ghanaian institutions lack this human resource capacity. This lack of exper- tise may adversely affect the quality of training. Moreover, an important capacity that is lacking in Ghana is the technical skills to analyse so-called â€œbig data.â€_x009d_ Expertise in data analysis is required…	One advantage of bioinformatics is the availability of several free, open-source resources (FOSR). FOSR allow for a virtual learning model of education to be applied to bioinformatics, allowing remote access to teaching materials [67]. Some of these FOSR directories are provided in S3 Table. Ghana can adopt such resources to improve bioinformatics knowledge.	Pragmatic approaches should therefore be developed to train more people so they can lead teaching and research in bioinformatics Developing collaborations between Ghanaian scientists could be a useful mechanism to build bioinformatics expertise [13,38]. This approach would present new opportunities, for instance, in collaborative research and student training [1,13,14,38]. Developing collaborativ…	Although the approach of offering short courses and workshops is laudable, this model of teaching bioinformatics broadly can hardly produce scientists with expert knowledge in the discipline [72]. For example, participants at introductory bioinformatics courses are usually taught how to compare protein and nucleic acid sequences using alignment tools such as the Basic Local Alignment Search Tool …	N/A	N/A	Highlights training needs/status
248	Kibet 2024	Designing and delivering bioinformatics project-based learning in East Africa.	2024	BMC Bioinformatics	Case Study	Training	2024	Focus on Africa only	Kenya	Bioinformatics	Kenya	Initial Year (2018): The training consisted of a 5-week residential training program. 2020 (Virtual Training): The program was redesigned to last for 8 weeks to avoid online fatigue and allowed more time for participants to engage with the content.	Hybrid	Regular (Yearly, Monthly)	Yes	Relevant training resources are made available online. The program utilized platforms such as GitHub for content management and collaboration, where materials and resources for training were stored and shared. This repository likely includes educational materials, project guidelines, and potentially recorded sessions from the training. Furthermore, the emphasis on collaboration and resource shari…	Several areas of deficiency in the training were identified throughout the evaluations. Some key deficiencies include: 1. Inadequate Hands-On Training: Initially, participants noted that the training had limited practical components due to the time constraints of the modules, leading to a greater focus on theoretical aspects rather than hands-on experienceÂ . 2. Overlapping Content: The program f…	Several training opportunities were identified throughout the implementation of the EANBiT program: 1. Project-Based Learning: The program emphasized project-based and hands-on learning, which has been noted to effectively prepare students for real-world research scenarios. This approach not only equips participants with technical skills but also nurtures soft skills like problem-solving and crit…	Skill Improvement: Participants reported significant improvements in their comfort and competency across various technical skills, particularly in areas such as command line usage, Git and GitHub, and workflow languages. Surveys indicated a tangible increase in participants' self-assessed abilities following the trainingÂ ,Â . Project Implementation: Many participants engaged in collaborative min…	The nature of the training provided by the Eastern Africa Network for Bioinformatics Training (EANBiT) evolved over time, incorporating various formats: 1. In-Person Training (2018): Initially, the training was conducted as a 5-week residential program, where participants attended in person at various locations. 2. Fully Online Training (2020): Due to the COVID-19 pandemic, the program was redesi…	EANBiT (East Africa Network for Bioinformatics Training	National Institutes of Health	Training
238	Sharaf 2024	Establishing African genomics and bioinformatics programs through annual regional workshops.	2024	Nature genetics	Opinion/Perspective	Training	2023	Focus on Africa only		Genomics; Bioinformatics	Morroco, South Africa, Kenya, Nigeria	5 days	In-person	One-off	No	No	Participants noted ethical compliance for sample collection, data and biomaterial specimen sharing, and a lack of clear policy as important factors slowing down their genomics research work."	"One outcome of the workshop series was the launch of a comprehensive fellowship program."	"The workshops allowed the AfricaBP Open Institute to identify several grassroots scientists who are well positioned to have a local impact in genomics and bioinformatics."	"In 2023, we implemented 28 workshops on biodiversity genomics and bioinformatics, covering 11 African countries across the 5 African geographical regions."	The AfricaBP Open Institute	N/A	Training
237	Mulder 2017	Development of Bioinformatics Infrastructure for Genomics Research.	2017	gscience, Global heart	Review article	Highlights training needs/status	2017	Focus on Africa only	Africa	Genomics; Bioinformatics	N/A	N/A	N/A	N/A	N/A			cross-disciplinary approach, requiring proficiency from fields of biology, computer science, mathematics, and statistics.		challenges identified include slow and unstable Internet connectivity; unreliable power supply; continent- wide obsolete computer infrastructure that varies between medium-scale server infrastructure to a small number of workstations, with multiple operating systems (Windows, Linux) for different purposes; and a lack of centralized and secure data storage.	N/A	N/A	Highlights training needs/status
235	Pyden 2023	Teaching Infectious Disease Pathology and Taking it To Africa.	2023	Modern Pathology	Case Study	Training	2014 till date	Focus on Africa only	Rwanda	Genomics; Bioinformatics	USA	N/A	In-person	Regular (Yearly, Monthly)	No	No	Initially, the program relied on visiting lecturers working in Rwanda from other in- stitutions (eg, Centers for Disease Control and Prevention and private sector) and teaching faculty from partner US institutions through the Human Resources for Health program 10 for teach- ing and tutoring of residents. In 2017, the contribution of faculty from US partner institutions was estimated at 96 of 240 …	"Opportunities for career development of the recent pathology graduates and teaching faculty in Rwanda are needed and currently being planned.	We also present selected metrics of the potential effect of such an integrative ID pathology service.	Postgraduate medical training in pathology was established in Rwanda in 2013 with the creation of the Master of Medicine (MMed) degree because it is known throughout the African continent dthe equivalent of US residency training. The MMed in Pathology is a 4-year program leading to a qualification in anatomical pathology. Since its inception, 24 residents have enrolled in the program in Rwanda: 1…	Brigham and Women's Hospital in Boston, MA	N/A	Training
220	Onywera 2024	Boosting pathogen genomics and bioinformatics workforce in Africa.	2023	Lancet infectious disease	Opinion/Perspective	Training	2023	Focus on Africa only	Africa	Genomics; Bioinformatics	Africa	2 years	N/A	N/A	N/A				Trained individuals have also extended the local expertise back in their home countries, and have begun or are in the process of supporting multi-pathogen surveillance initiatives. The training workshops have also expanded the genomic capabilities of the training institutes and increased their continental and global recognition, which improves their potential for collaboration with public health,…	Since the early stage of the COVID-19 pandemic, the Africa CDCâ€“Africa PGI has been using short-term strategies to respond to the immediate needs of the continent and to rapidly fill the genomics and bioinformatics gaps. The strategies included short-term training workshops and provision of technical support and mentorships. Specifically, hands- on support was provided to NPHIs and NRLs followin…	Africa CDC	N/A	Training
205	Osunmakinde 2018	Overview of Trends in the Application of Metagenomic Techniques in the Analysis of Human Enteric Viral Diversity in Africa's Environmental Regimes.	2018	MDPI, Viruses	Review article	Highlights training needs/status	2018	Focus on Africa only	Africa	Genomics	N/A	N/A	N/A	N/A	N/A		The relatively high cost of modern molecular technologies, as well as computational human expertise for the analysis of the data generated, have greatly contributed to the slow growth of the viral microbial ecological research community in Africa.		GS is undeniably a key technology; however, the implementation of this technique is still a challenge in Africa. A wide range of challenges are defying researchers in Africa, such as limited scientific resources, limited human skills, insufficient training and lack of access to genome sequencing facilities. In addition, we recommend that more energy should be directed towards instituting more wat…		N/A	The University of South Africa	Highlights training needs/status
138	AbiaALK 2023	The African Wastewater Resistome: Identifying Knowledge Gaps to Inform Future Research Directions.	2023	MDPI, Antibiotics	Review article	Highlights training needs/status	2012-2022	Focus on Africa only	Africa	Genomics; Bioinformatics	Africa	2012-2022	N/A	N/A	N/A	N/A	Sequencing technologies and bioinformatics	Culture-based methods introduce selection bias, while metagenomics, though more comprehensive, is rarely used due to high costs and limited technical expertise, particularly in bioinformatics.	5. Proposed Future Perspective It is evident that wastewater-based monitoring of AMR is gaining significant ground globally, including in South Africa. However, this could still be challenging in many African countries as most LMICs lack structured sewer systems. However, in places such as South Africa where such facilities are available: (i). There is a need to standardise protocols for assessin…	Moreover, culture-based approaches would introduce selection bias, as only a subset of isolates is usually selected for downstream analysis. This would also be the case with WGS, where a selected number of isolates would be subjected to sequencing. On the other hand, metagenomic approaches would identify genes in a total population, regardless of the micro-organisms. Despite the advantages of gen…	N/A	N/A	Highlights training needs/status
