# Supplementary material for: Harnessing Genomic and Bioinformatics for Surveillance of Pathogens in Africa: A Scoping Review of Existing Training and Gaps in Training
Source: Research Square preprint supplement (doi:10.21203/rs.3.rs-7651167/v1), 2025-12-11
Supplement: Supplementary file 2 [file ba2999c141ee9af529a1fc0f.xlsx]

## Sheet: Table 2
Study ID	Title	Date of training	Is the training exclusively focused on Africa?	Training focus country(ies)	Focus of training or text	Where did the training/Study take place?	Length of training or review	Nature of training	Frequency of training	Training or relevant resources available online?	Links to training information or resources	Training Organisers	Training Funders	Training Host Country
DuarteASR 2020	Addressing Learning Needs on the Use of Metagenomics in Antimicrobial Resistance Surveillance.	2020	Africa and other parts of the world	Africa	Genomics	Not clear	Not specified	In-person	One-off	Yes	https://www.coursera.org/learn/metagenomics	European project Ecology from Farm to Fork Of Microbial drug Resistance and Transmission (EFFORT) H3	European Commision	Not clear
Binder 2021	African National Public Health Institutes Responses to COVID-19: Innovations, Systems Changes, and Challenges.	2021	Focus on Africa only	Africa	Genomics; Bioinformatics	Multiple sites in Africa	2 days	Not specified	Not specified	No	N/A	The International Association of National Public Health Institutes (IANPHI), Africa Regional Network	US CDC	Online
Bentahir 2022	Providing On-Site Laboratory and Biosafety Just-In-Time Training Inside a Box-Based Laboratory during the West Africa Ebola Outbreak: Supporting Better Preparedness for Future Health Emergencies.	2014-2015	Focus on Africa only	Guinea, Sierra leone, and Liberia	Genomics	Guinea Conakry	4 months	In-person	One-off	No	No	The Biological Light Fieldable Laboratory for Emergencies (B-LiFE)	European Space Agency Integrated Applications Promotion (IAP) Advanced Research in Telecommunications Systems (ARTES) programme.	Guinea Conakry
Nembaware 2019	The African Genomic Medicine Training Initiative (AGMT): Showcasing a Community and Framework Driven Genomic Medicine Training for Nurses in Africa.	2016	Focus on Africa only	Africa	Genomics	Online	Not specified	Online	Still ongoing	No	No	Not specified	National Institutes of Health	Senegal
Musanabaganwa 2020	Building Skills and Resources for Genomics, Epigenetics, and Bioinformatics Research for Africa: Report of the Joint 11th Conference of the African Society of Human Genetics and 12th H3Africa Consortium, 2018.	2020	Focus on Africa only	Africa	Genomics; Bioinformatics	Rwanda	Two days	In-person	Regular (Yearly, Monthly)	No	No	African Society of Human Genetics (AfSHG)	The Government of Rwanda, The National Institutes of Health, The Wellcome Trust, Institute Pasteur, Promega Corporation, Africa Biosystems Limited, The Galton Institute	Rwanda
Nyaga 2020	Report of the 1st African Enteric Viruses Genome Initiative (AEVGI) Data and Bioinformatics Workshop on whole-genome analysis of some African rotavirus strains held in Bloemfontein, South Africa.	2018	Focus on Africa only	Africa	Genomics; Bioinformatics	South Africa	4 days	In-person	One-off	No	N/A	African Enteric Viruses Genome Initiative (AEVGI)	Bill and Melinda Gates Foundation	South Africa
MaljkovicBerry 2020	A Department of Defense Laboratory Consortium Approach to Next Generation Sequencing and Bioinformatics Training for Infectious Disease Surveillance in Kenya.	2019	Focus on Africa only	Kenya	Genomics; Bioinformatics	Kenya	One week	In-person	One-off	No	No	United States Government and the Department of Defense (DoD)	United States Government and the Department of Defense (DoD)	Kenya
HernÃ¡ndez-de-Diego 2017	The eBioKit, a stand-alone educational platform for bioinformatics.	2017	Focus on Africa only	Africa	Bioinformatics	Multiple sites in Africa	2007 till date	In-person	Still ongoing	Yes	http://www.ebiokit.eu	Not specified	Not specified	Niger, Nigeria, Camerron, Uganda, Kenya, Tanzania, Mauritius, South Africa
Shaffer 2019	Expanding Research Capacity in Sub-Saharan Africa Through Informatics, Bioinformatics, and Data Science Training Programs in Mali.	2017	Focus on Africa only	Mali	Genomics; Bioinformatics	Multiple sites in Africa	Not specified	In-person	Regular (Yearly, Monthly)	No	No	University of Sciences, Techniques and Technologies of Bamako, Mali (USTTB)	National Institutes of Health	Mali
Marine 2019	Strengthening laboratory surveillance of viral pathogens: Experiences and lessons learned building next-generation sequencing capacity in Ghana.	2019	Focus on Africa only	Africa	Genomics	Multiple sites in Africa	21 weeks	In-person	One-off	No	No	Department of Virology, Noguchi Memorial Institute for Medical Research, University of Ghana, Legon, Ghana, Division of Viral Diseases, CDC, Atlanta, GA, USA	US CDC	Ghana
Gehre 2023	The East African Community mobile laboratory network prepares for monkeypox outbreaks.	2022	Focus on Africa only	East Africa	Genomics	Multiple sites in Africa	Not specified	In-person	One-off	No	No	Bernhard Nocht Institute for Tropical Medicine and the National Public Health Laboratories (NPHLs) of Tanzania, Kenya, Uganda, Rwanda, Burundi and South Sudan	German Federal Ministry for Economic Cooperation and Development (BMZ) through the German Development Bank, KfW	Burundi, Rwanda, Tanzania, Kenya, Uganda, and South Sudan
Tindana 2017	Developing the science and methods of community engagement for genomic research and biobanking in Africa.	2016-03-22	Focus on Africa only	Africa	Genomics; Bioinformatics	Multiple sites in Africa	Not specified	In-person	One-off	No	No	Human Heredity and Health in Africa Initiative (H3Africa)	National Institutes of Health and the Wellcome Trust	South Africa
Abrudan 2021	Train-the-Trainer as an Effective Approach to Building Global Networks of Experts in Genomic Surveillance of Antimicrobial Resistance (AMR).	2021	Africa and other parts of the world	Nigeria, South Africa, Sudan	Genomics; Bioinformatics	United Kingdom	6 days	In-person	One-off	On demand	On demand	NIHR Global Health Research Unit (GHRU) through the Centre of Genomic Pathogen Surveillance (CGPS), Wellcome Genome Campus Advanced Courses and Scientific Conferences (ACSC	National Institute for Health Research and the Wellcome Trust	United Kingdom
Ras 2021	Using a multiple-delivery-mode training approach to develop local capacity and infrastructure for advanced bioinformatics in Africa.	2019	Focus on Africa only	Africa	Bioinformatics	Online	2 months	Online	Regular (Yearly, Monthly)	Yes	Project website and Vula and via a YouTube playlist.	The pan African Bioinformatics Network (H3ABioNet)	National Institutes of Health	Morocco, Nigeria, Ghana, Egypt, South Africa, Kenya, Uganda, Sudan, Mauritius, Tanzania, Tunisia
Ahmed 2020	Delivering blended bioinformatics training in resource-limited settings: a case study on the University of Khartoum H3ABioNet node.	2017	Focus on Africa only	Sudan	Genomics; Bioinformatics	Sudan	2 weeks	Blended	Regular (Yearly, Monthly)	Yes	2017 training resources (Text, ppt, videos) available online at https://training.h3abionet.org/IBT_2017.	The pan African Bioinformatics Network (H3ABioNet)	Not specified	Sudan
Gurwitz 2017	Designing a course model for distance-based online bioinformatics training in Africa: The H3ABioNet experience.	2016	Focus on Africa only	Africa	Genomics; Bioinformatics	Multiple sites in Africa	4 Months	Hybrid	Regular (Yearly, Monthly)	Yes	http://training.h3abionet.org/IBT_2016/	The pan African Bioinformatics Network (H3ABioNet)	Not specified	Africa
RiviÃ¨re 2021	Capacity building for whole genome sequencing of Mycobacterium tuberculosis and bioinformatics in high TB burden countries.	2018-2019	Africa and other parts of the world	Ethiopia	Genomics; Bioinformatics	Ethiopia	3 weeks	Blended	Regular (Yearly, Monthly)	No	No	The Tuberculosis Omics ResearCH (TORCH) consortium (Jimma University in Ethiopia, Stellenbosch University in South Africa and the University of Antwerp and the Institute of Tropical Medicine in Belgium).	VLIR-UOS	Ethiopia
Akintola 2024	Bioinformatics proficiency among African students.	2021-2024	Focus on Africa only	Africa	Bioinformatics	Multiple sites in Africa	Not specified	Hybrid	Not specified	No	No. Organised Sporadically	NOBLEKINMAT LTD	Not specified	Africa
Kibet 2024	Designing and delivering bioinformatics project-based learning in East Africa.	2024	Focus on Africa only	East Africa	Bioinformatics	Online	8 weeks	Online	Regular (Yearly, Monthly)	Yes	GitHub	EANBiT (East Africa Network for Bioinformatics Training	National Institutes of Health	Kenya
Sharaf 2024	Establishing African genomics and bioinformatics programs through annual regional workshops.	2023	Focus on Africa only		Genomics; Bioinformatics	Multiple sites in Africa	5 days	In-person	One-off	No	No	The AfricaBP Open Institute	Not specified	Morroco, South Africa, Kenya, Nigeria
Pyden 2023	Teaching Infectious Disease Pathology and Taking it To Africa.	2014 till date	Focus on Africa only	Rwanda	Genomics; Bioinformatics	USA	Not specified	In-person	Regular (Yearly, Monthly)	No	No	Brigham and Women's Hospital in Boston, MA	Not specified	USA
Onywera 2024	Boosting pathogen genomics and bioinformatics workforce in Africa.	2023	Focus on Africa only	Africa	Genomics; Bioinformatics	Multiple sites in Africa	2 years	Not specified	Not specified	No	No	Africa CDC	Not specified	Africa
